# Supplementary material for: RNA Granules Present Only in Extracellular Toxoplasma Gondii Increase Parasite Viability
Source: PubMed Central journal article supplement — Int J Biol Sci. 2011 Aug 7;7(7):960–7. doi: 10.7150/ijbs.7.960 (PMC3157270; doi:10.7150/ijbs.7.960), 2011-08-07

## Supplementary materials

### RNA granules present only in extracellular *Toxoplasma gondii* increase parasite viability

Dario Lirussi and Mariana Matrajt

Figure S1. Immunofluorescence assay followed by RNA FISH (Poly (A)+ mRNA: Cy5). A) Transiently transfected parasites expressing TgAGO (green) (plasmid pMAH14 containing argonaute, TgAGO, in frame with N-terminal HA-Flag tag). B) 14-3-3 protein detected by IFA (green) followed by RNA FISH C) TgRACK1-FLAG (blue) expressing parasites, followed by RNA FISH.

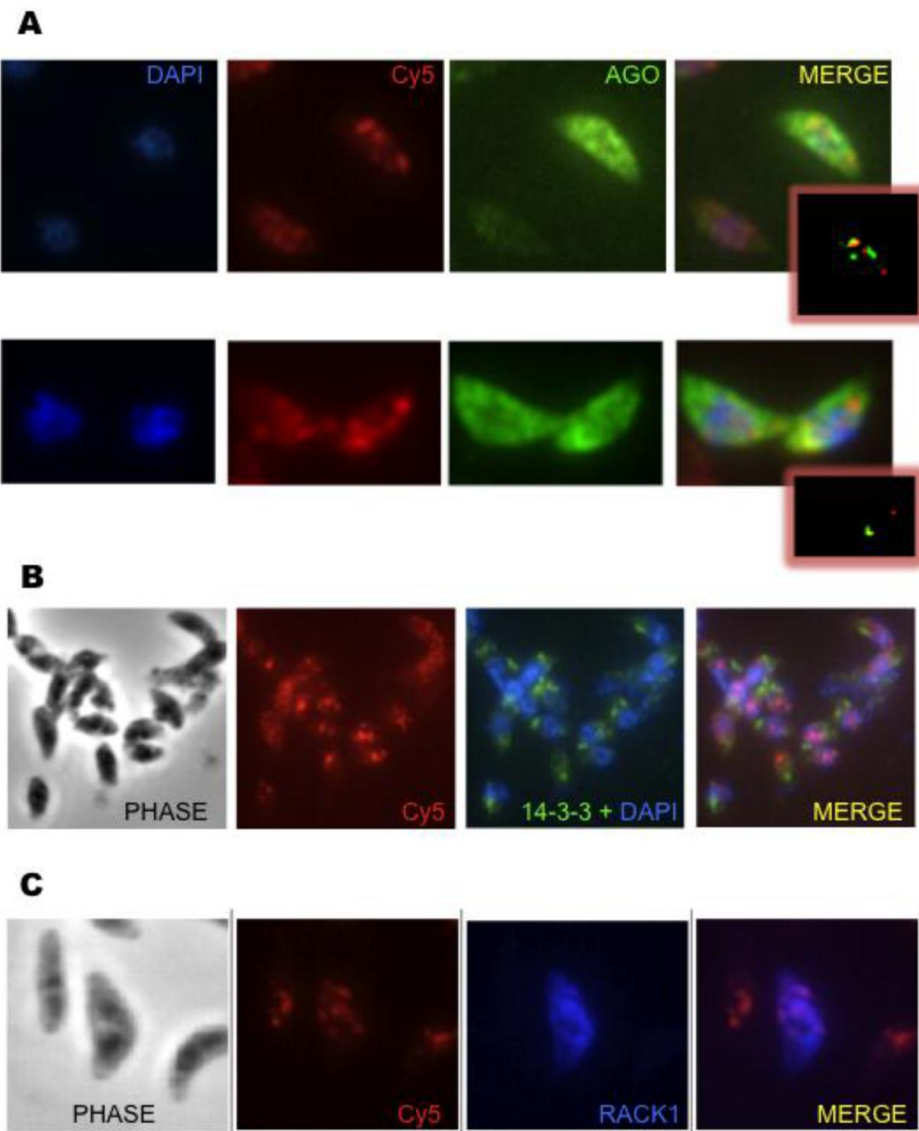

Figure S2. Changes in reduced glutathione (GSH) measured upon oxidative induction with H<sub>2</sub>O<sub>2</sub> 200 μM during 1 hour on extracellular and intracellular (tachyzoites) parasites. Promega GSH-Glo™ Glutathione Assay was used on 10<sup>6</sup> *T gondii* parasites in triplicate, according manufacturer instructions. Luciferase activity was measured in a single tube Berthold Lumat LB 9507 luminometer.

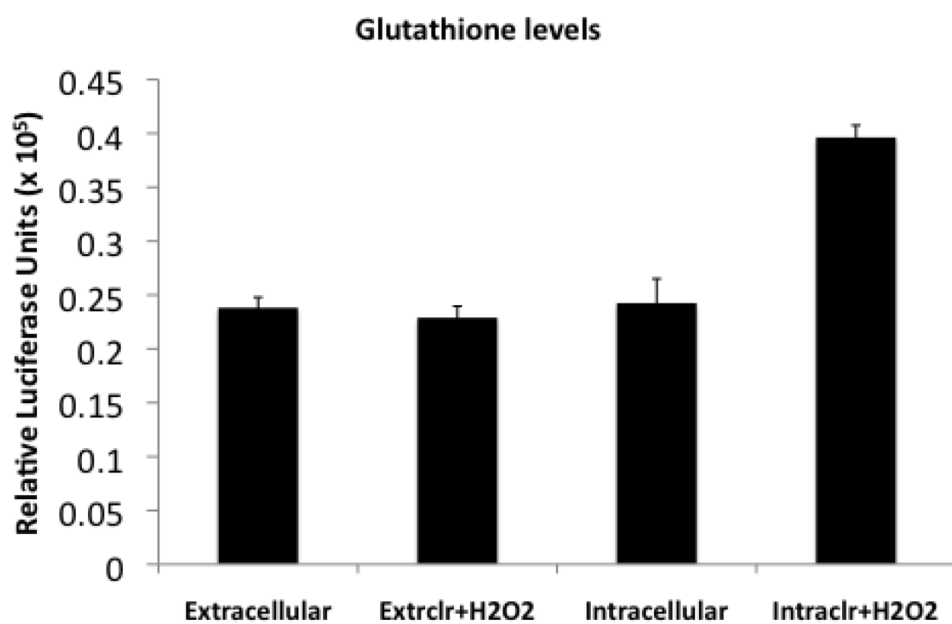

Supplement: ijbsv07p0960s1.pdf [file ijbsv07p0960s1.pdf]
